# Supplementary material
Source: PubMed Central journal article supplement (PMC4177315)
Supplement: NIHMS621785-supplement-Supp_FigureS1-S5___TableS1.pdf [file NIHMS621785-supplement-Supp_FigureS1-S5___TableS1.pdf]

## Supporting Information for

### “Redox-dependent lipoylation of mitochondrial proteins in *Plasmodium falciparum*”

Gustavo A. Afanador, Krista A. Matthews, David Bartee, Jolyn E. Gisselberg, Maroya S. Walters, Caren Freel Meyers, Sean T. Prigge

Figure S1

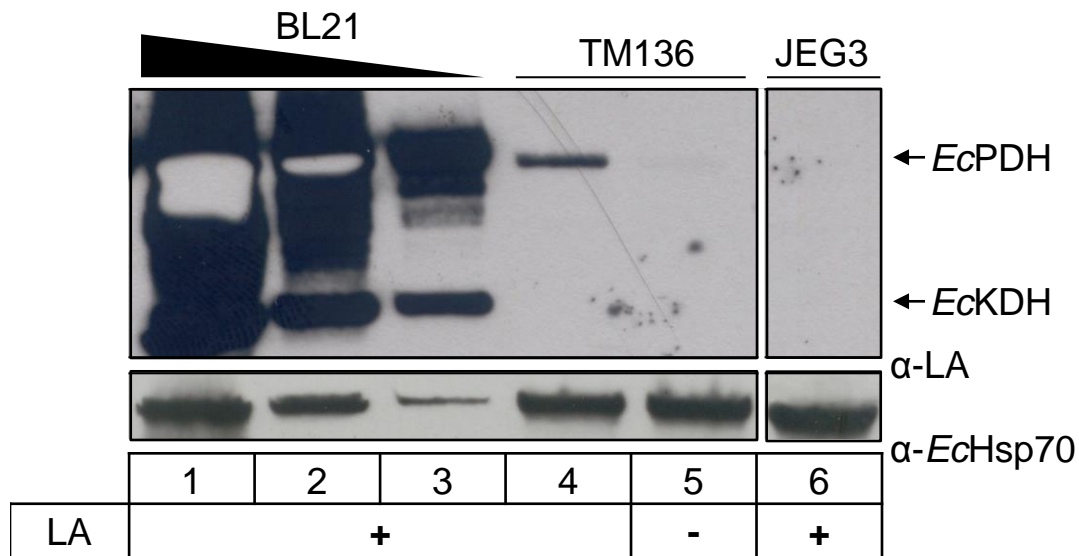

**Fig. S1.** Analysis of *lplA*-/*lipB*- knockout *E. coli* cell line JEG3. Cultures of three different *E. coli* cell lines (BL21, TM136 and JEG3) were normalized by OD<sub>600</sub> before analysis by western blot using antibodies specific for lipoylated proteins ( $\alpha$ -LA) and antiserum specific for *E. coli* Hsp70 ( $\alpha$ -Hsp70) as a loading control. Lipoate (LA) was added to the cultures grown in minimal medium (containing succinate and acetate) to assess lipoate ligase activity which is still present in the TM136 *lplA*-/*lipB*- disruption cell line, but not the JEG3 *lplA*-/*lipB*- knockout cell line.

## Figure S2

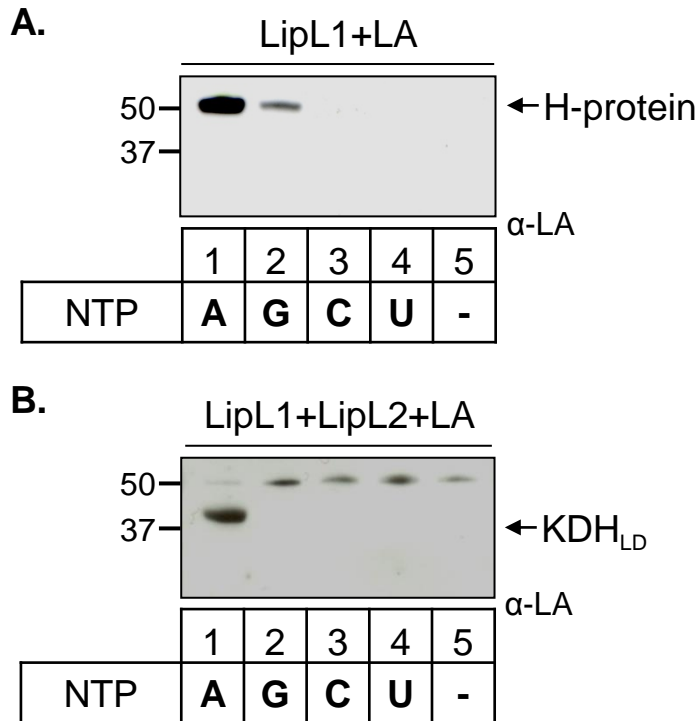

**Fig. S2.** Ligation reactions proceed through an ATP-dependent reaction.

(A) Western blot analysis of ligation reactions catalyzed by LipL1 showing that the H-protein is preferentially lipoylated using ATP (A) as a nucleotide source with minor activity observed for GTP (G), but not for CTP (C) or UTP (U).

(B) Western blot analysis of ligation reactions catalyzed by LipL1 and LipL2 showing that the KDH<sub>LD</sub> is preferentially lipoylated using ATP (A). Note a minor population of *E. coli* E2-KDH found in purified LipL2.

Figure S3

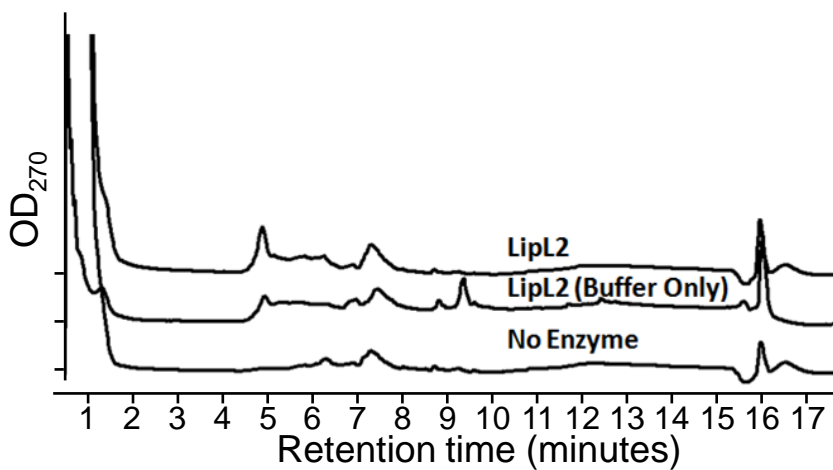

**Fig. S3.** HPLC traces for LipL2 reaction and controls. LipL2 was incubated in the presence of LA and ATP as described in the Methods (LipL2 trace). As a control we ran a sample of LipL2 with no reactants (Buffer only) and a sample with all reactants but no enzyme (No Enzyme).

## Figure S4

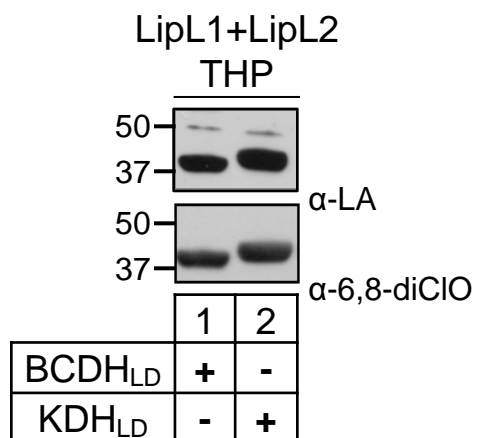

**Fig. S4.** Modification of BCDH<sub>LD</sub> and KDH<sub>LD</sub> in the presence of THP.

LipL1 and LipL2 can modify both substrates with LA (top panel) or 6,8-diClO (lower panel) in a coupled reaction in the presence of the strong reducing agent THP, similar to the results with TCEP (see Fig. 4B).

## Figure S5

Harmonized LipL2 nucleotide sequence.

```
ATGCGCATCATTAAGTGTCTAGATCAGATTTTCCGGCCGGTACTGCCGAATGTGAACATTAACA
ACATTCAGAAGAACAACAAAAAATTAATATCCTCTATTTTCATCGATGTATCAAAATTTTCATGTGTT
TGAACAACCTTCTGCTGGAAGAGAGCCTGTTTTCGGATTAGCAACAACACCACCGAAGGCCTGAAT
AACATTGGTTTTTGTAAATCGTGAACAACACCTGCGAAGAAATGAACGAGTCGAAAGGCAATGAAT
GTATCTTTAACAACAAGAAATGCGTCATTCTGGGTATCAGCAACAATAAAGATCATATTTAA
AGATACGAACTATATCAAAGAAAACAAAATTTCACTGATCAAACGCTTTACCGCGGGTGGCAGC
ATTTACATTAACAACAAACAGCCTGCTGGTTTTCTCTGATTCTCCACATAAATTTGAAAAAACA
AAAAAATCTATCCGAGCAACATCACAGAATGGTCCTATAACTATTTCTACAACACCTCAAAACA
GATTTATGATAAAAACCCAGATTAATAACGAAAAAACTCCCTGAATAAAAACCATATCTTATTT
AACCAGTATTTTAACTATTATGAAAACGATTATGTGTATAAAGATTATGATGAACATAACAAAA
ACATAATCCTGAAAAAAGTCGGCGGTAACGCACAGAGCTTCGCCCGTAACTATTTTCGTGCATCA
CACGAGCTATATTTGGACCTGCGATTACAAGGAAATGAACAACATTCTGCTGAACCCGTCAAAG
CAGCCGATTTACCGTAACAACGCAAACATCAGCACTTTCTTCAAAGCATAAAAACCTGTGCCTTC
ATGATGATATTCACACCCCAAACATTTTTATCGAAAAACTGATCAAACATATTAACACATAAT
TAATTATAAAAACATCACGGATCAGCATGATTACTGGTTCTTTAATAAAAATCAACCTGAAAAAC
ATCAACGATCATATTTCTGCGTAACTCAGAACACTTTGATGATATTTATGTAGCGGATATGAACT
TGCTGCAGTGTATCTTTAATTATTATAACAACAGCAGCTTGTTCAACAACATGCGCAGTACGTA
TTTCTGGATTTAGAGGGAAAAAAGTTAGTGATCGGTATTACGATATTCGGACCTATTTTCTC
TAATAA
```

Harmonized LipL2 amino acid sequence.

```
MRI IKCLDQIFRPVLPNVNINNIQKNKKINILYFIDVSKFHVFEQLLLEESLFRISNNTTEGLN
NIGFVIVNNTCEEMNESKGNECIFNNKKCVILGISNLIKDHKDTNYIKENKISLIKRFRTGGGT
IYINKNSLLVSLILPHKFEKNKKIYPSNITEWSYNYFYNTSKQIYDKTQINNEKNSLNKNHILF
NQYFNYYENDYVYKDYDEHNKNIILKKVGGNAQSFARNYFVHHTSYIWTCDYKEMNILLNPSK
QPIYRNKRKHQHFLQSIKLC LHDDIHTPNIFIEKLIKHIKHI INYKNITDQHDYWFFNKINLKN
INDHILRNSEHFDDIYVADMNLLQCI FNYNNSSLFNNMRSTYFLDLEGKKVSDRYDYDIPTYFL
--
```

**Fig. S5.** Nucleotide and amino acid sequence for synthetic harmonized LipL2 based on gene

PF3D7\_0923600. Cysteine 93 and cysteine 276 are conserved in the sequences of LipL2 proteins from malaria parasites and are highlighted in yellow.

**Table S1.** Primers and plasmids used in this study.

| Plasmid                        | Primer Name                 | Primer Sequence                                                                 |
|--------------------------------|-----------------------------|---------------------------------------------------------------------------------|
| pMALcHT-LipL1                  | n/a                         | pMA006 as described in (Allary <i>et al.</i> , 2007).                           |
| pMALcHT-LipL2                  | n/a                         | none - excised using <i>EcoRI</i> and <i>HindIII</i> from synthesized gene      |
| pMALcHT-LipL1 <sub>K160A</sub> | LipL1 <sub>K160A</sub> .F   | GAAACGATATTACAGTAAATGATCAA <sub>gca</sub> TGTTTCAGGTTCTGCTTTTAAAAAAA            |
|                                | LipL1 <sub>K160A</sub> .R   | TTTTTTTAAAAGCAGAACCTGAACATGCTTGATCATTTACTGTAATATCGTTTC                          |
| pMALcHT-LipL2 <sub>C93A</sub>  | LipL2 <sub>C93A</sub> .F    | GTATCTTTAAACAACAAGAAA <sub>gct</sub> GTCATTCTGGGTATCAG                          |
|                                | LipL2 <sub>C93A</sub> .R    | CTGATACCCAGAATGACAGCTTTCTTGTTGTTAAAGATAC                                        |
| pMALcHT-LipL2 <sub>C276A</sub> | LipL2 <sub>C276A</sub> .F   | CTCAAAGCATAAAACTG <sub>gct</sub> CTTCATGATGATATTCAC                             |
|                                | LipL2 <sub>C276A</sub> .R   | GTGAATATCATCATGAAGAGCCAGTTTTATGCTTTGAAG                                         |
| pMALcHT -LplA                  | LplA.BamHI.F                | <u>GGTGGT<b>GGATCC</b>ATGTCCACATTACGCTGCTCATCTC</u>                             |
|                                | LplA.SalI.R                 | <u>GGTGGT<b>GTCGAC</b>CTACCTTACAGCCCCCGCCATC</u>                                |
| pGEXT-BCDH <sub>LD</sub>       | BCDH.BamHI.F100             | <u>GGCGGCG<b>GATCC</b>GTGAAATGCAAATTATTTGATATAGG</u>                            |
|                                | BCDH.EcoRI.R417             | <u>GGCGGCG<b>GAATTC</b>TTATAAACTTAAATCACTTTCACCATC</u>                          |
| pGEXT-KDH <sub>LD</sub>        | KDH.BamHI.F103              | <u>GGCGGCG<b>GATCC</b>ATTGAAGGATCACTTAAGAGATATTTTC</u>                          |
|                                | KDH.EcoRI.R456              | <u>GGCGGCG<b>GAATTC</b>TTAATTTAATTGATTAATGTATAATTATTTTC</u>                     |
| pGEXTK                         | Kan.BspHI.F                 | <u>GGTGGTTCATGAGGATGGCTTTCTTGCCGCCAAGG</u>                                      |
|                                | Kan.BspHI.R                 | <u>GGTGGTTCATGACGCCCGGCGGCAACCGAG</u>                                           |
| pGEXTK-BCDH <sub>LD</sub>      | n/a                         | none - excised using <i>BamHI</i> and <i>SalI</i> from pGEXT-BCDH <sub>LD</sub> |
| pGEXTK-KDH <sub>LD</sub>       | n/a                         | none - excised using <i>BamHI</i> and <i>SalI</i> from pGEXT-KDH <sub>LD</sub>  |
| pGEXTK-Hprot                   | Hprot.BamHI.F               | <u>GGTGGT<b>GGATCC</b>GAAATATATAAAAAATTGAGGATGAAAATTGAAC</u>                    |
|                                | Hprot.SalI.R                | <u>GGTGGT<b>GTCGAC</b>TTATTTCCCCCTTGCCCTTTATTTTC</u>                            |
| pRL2-BCDH <sub>30</sub> GFP    | BCDH <sub>30</sub> .AvrII.F | <u>GGTGGTGCTAGCCCT<b>AGGATG</b>TTTGTGAAGAATGTACTAAACGTGC</u>                    |
|                                | BCDH <sub>30</sub> .BsiWI.R | <u>GGTGGT<b>CGTACG</b>ATGTATTGCACTCGTGTTCCAGGTAATG</u>                          |
| pRL2-KDH <sub>30</sub> GFP     | KDH <sub>30</sub> .AvrII.F  | <u>GGTGGT<b>CCTAGGATG</b>ACAAAGAATCTTGTATTTTCGATTAATAAATC</u>                   |
|                                | KDH <sub>30</sub> .BsiWI.R  | <u>GGTGGT<b>CGTACG</b>ATTATACTTATGGTTTAAAAATGTTCTATTAAACTTTT</u>                |
|                                | LplA.H.F                    | <u>AAAGCGAGAAAAAAGAGTGACCCATTACTACAAGAAAGGAAATCGTTATG</u>                       |
|                                | LplA.H.R                    | <u>AAGAGAAAGTTGCCCGCATGGGCGGGTAACTACCTTACAGCCCCCGCCAT</u>                       |
|                                | K1.int.F                    | <u>AGGCTATTCGGCTATGACTG</u>                                                     |
|                                | K2.int.R                    | <u>GCAGTTCATTCAGGGCACCG</u>                                                     |
|                                | LplA.U                      | <u>CTGGCGAAAGCGTCGAAGTG</u>                                                     |
|                                | LplA.D                      | <u>GCGTGATGCTGCCATTGAGG</u>                                                     |
|                                | LipB.U                      | <u>AGTGTAATTTGGGCCATTGATGTATGG</u>                                              |
|                                | LipB.D                      | <u>CCCACCTTTACTCATTCTCCACGGAGATGCCG</u>                                         |

The annealing portions of these sequences are underlined, endonuclease sites are marked by boldface type, italics marks relevant start and stop codons, and lower case text marks mutation sites.

Allary, M., J. Z. Lu, L. Zhu & S. T. Prigge, (2007) Scavenging of the cofactor lipoate is essential for the survival of the malaria parasite *Plasmodium falciparum*. *Mol Microbiol* **63**: 1331-1344.
